# Supplementary material
Source: HighWire-hosted journal article supplement (http://molpharm.aspetjournals.org/highwire/filestream/82179/field_highwire_adjunct_files/0/Supplemental_111047.pdf)
Supplement: Supplemental_111047.pdf [file Supplemental_111047.pdf]

**The effects of farnesoid X receptor activation on arachidonic acid metabolism,  
NF- $\kappa$ B signaling and hepatic inflammation**

Zhibo Gai, Michele Visentin, Ting Gui, Lin Zhao, Wolfgang E. Thasler, Stephanie Häusler, Ivan Hartling, Alessio Cremonesi, Christian Hiller and Gerd A. Kullak-Ublick

**Molecular Pharmacology**

**Results****Supplementary Fig. 1. NASH assessment in mice fed a HFD.**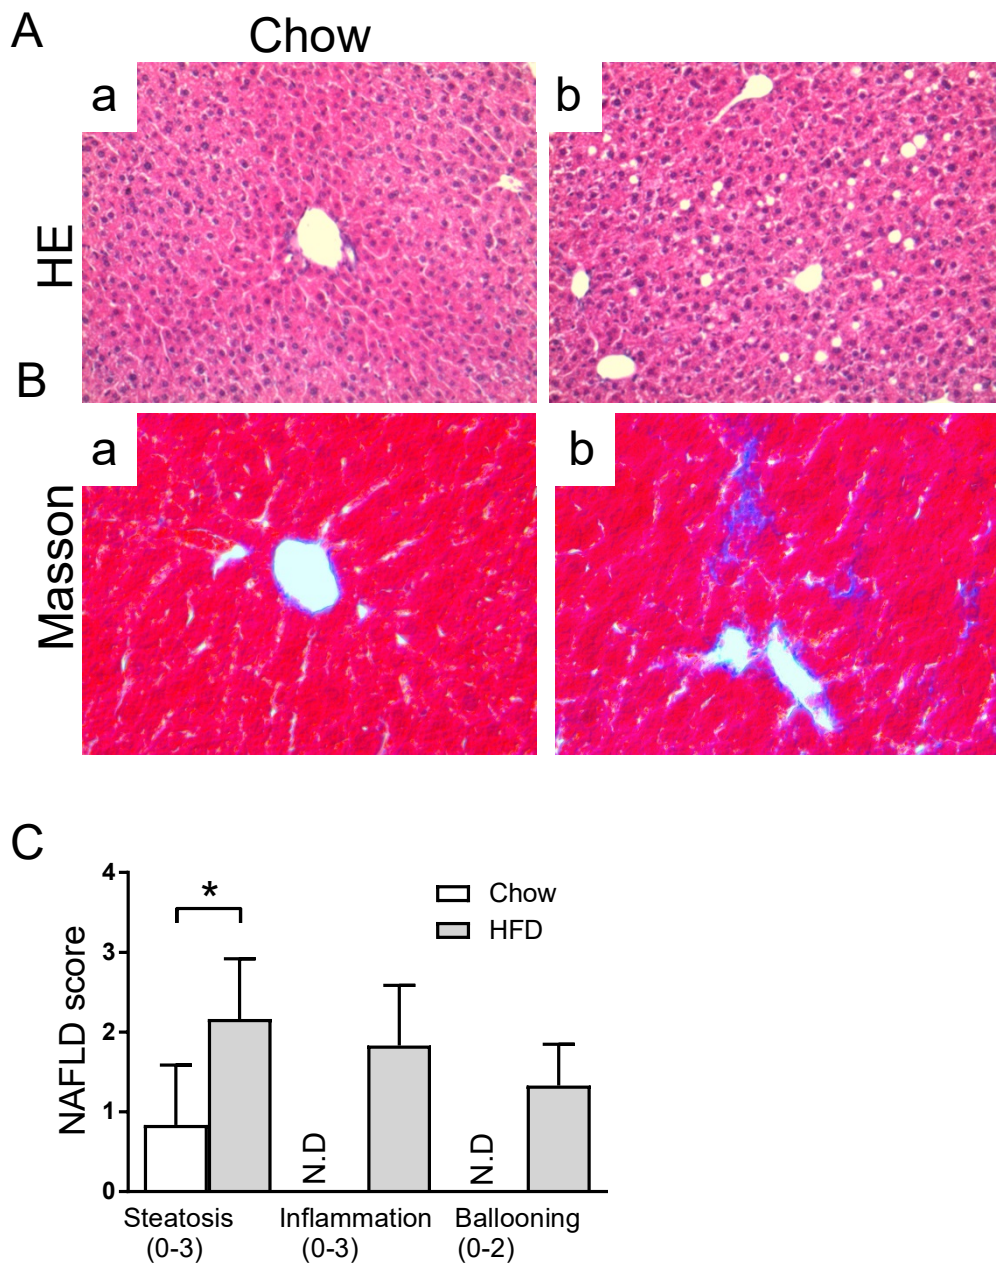

Representative images of hematoxylin-eosin (**A**) and Masson (**B**) staining in liver sections from chow and HFD groups. NAFLD score,  $n=6$  mice/group. Data are the means  $\pm$  SD, Student's  $t$  test,  $* < 0.05$  (**C**).

**Supplementary Fig. 2. Arachidonic acid metabolism in mice fed a HFD.**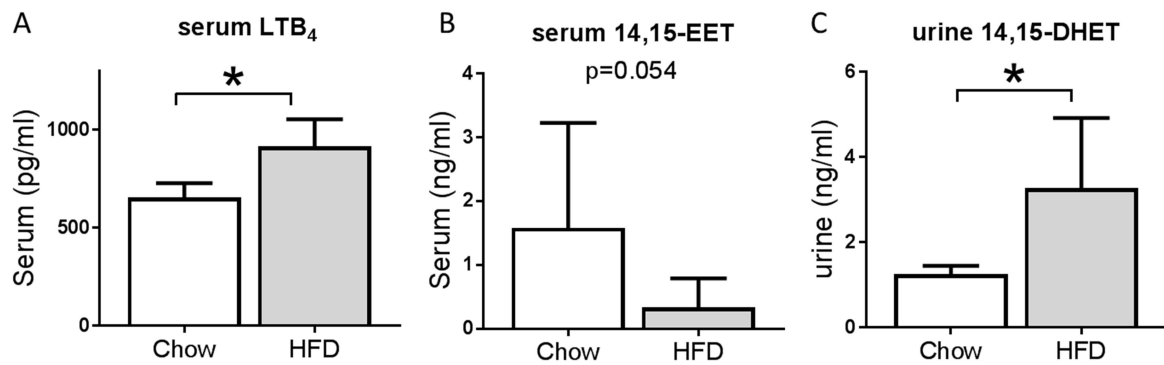

Serum levels of LTB<sub>4</sub> (**A**) and 14,15-EET (**B**). Urine levels of 14,15-DHET (**C**).  $n=6$  mice/group. means  $\pm$  SD, Student's  $t$  test,  $*<0.05$ .

**Supplementary Fig. 3. Effect of OCA on HFD-induced NASH.**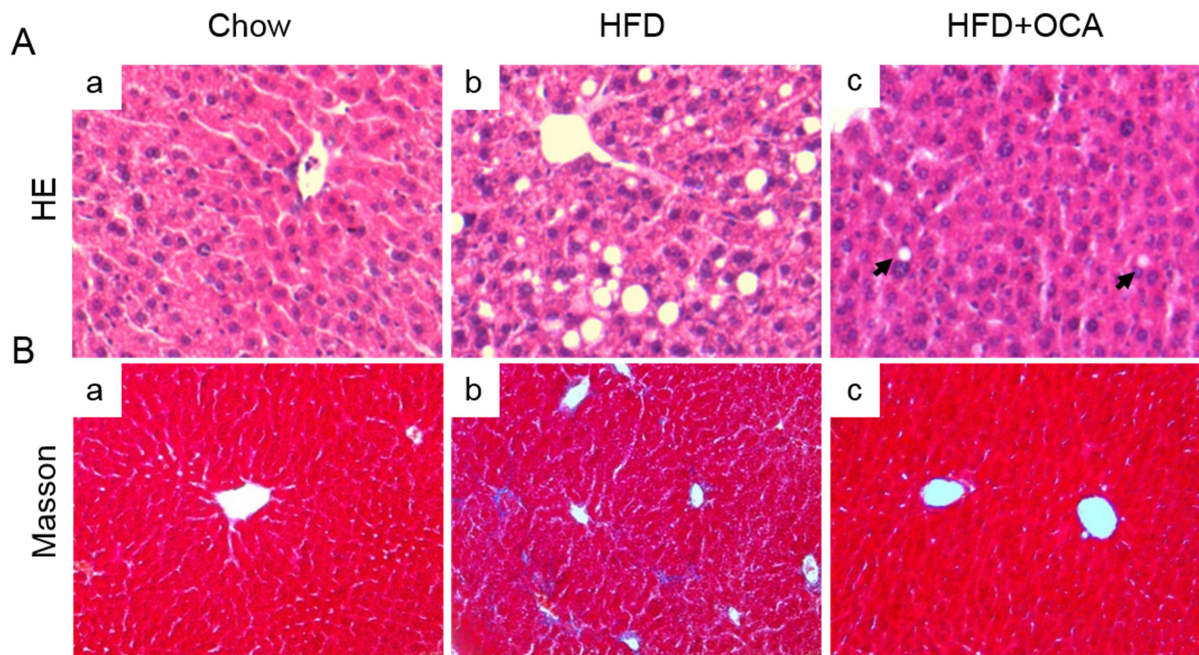

Representative images of hematoxylin-eosin (**A**) and Masson (**B**) staining in liver sections from chow (a), HFD (b) and HFD+OCA groups (c).

**Supplementary Fig. 4. Effect of OCA on the expression of FXR target genes in Huh7 cells.**

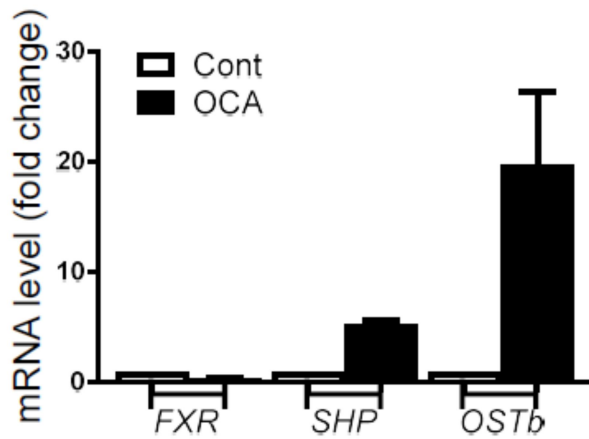

mRNA expression levels of FXR, SHP and OSTb in Huh7 cells exposed for 24h to OCA at the extracellular concentration of 2  $\mu$ M.  $n=3$  /group. Data are means  $\pm$  SD.

**Supplementary Fig. 5. Impact of FXR activation on FFA-induced monocyte migration and EET metabolism-related gene expression levels in primary cultured hepatocytes from mouse (A and B) and human (C and D).**

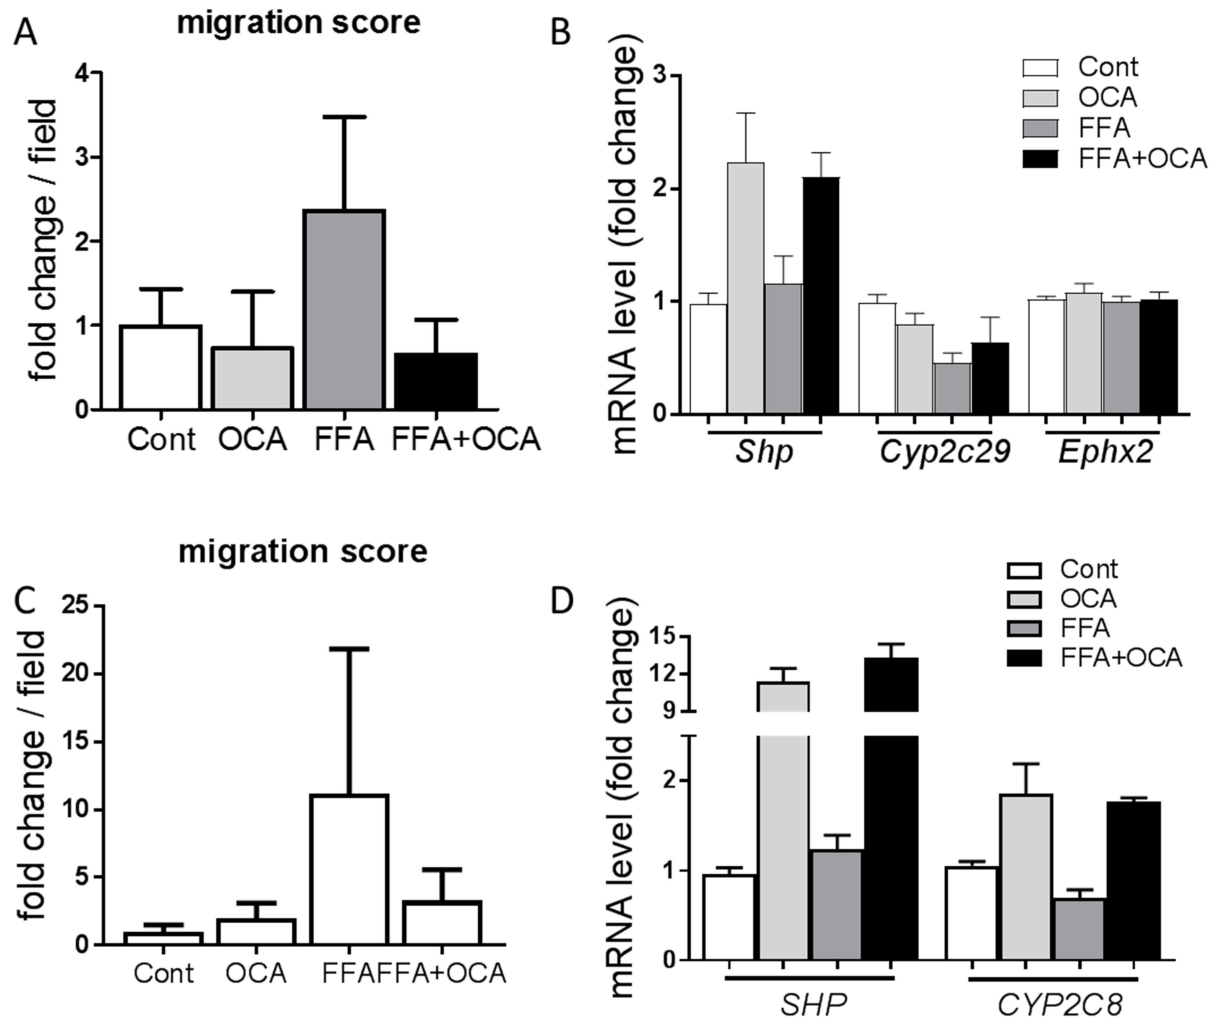

Migration score of J774 cells (**A**) and mRNA expression levels of *Shp*, *Cyp2c29* and *Ephx2* in primary cultured hepatocytes treated for 48h with the indicated conditions.  $n=3$ /group (**B**). Migration score of THP-1 cells (**C**) and mRNA expression levels of *SHP* and *CYP2C8* in primary cultured human hepatocytes treated for 48h with the indicated conditions. Data represents the mean $\pm$ SD from 3 technical replicate of one donor (**D**).

**Supplementary Fig. 6. Effect of the co-incubation with OCA and the FXR antagonist z-Guggulsterone (Gu) on FXR activation and FFA-induced monocyte migration.**

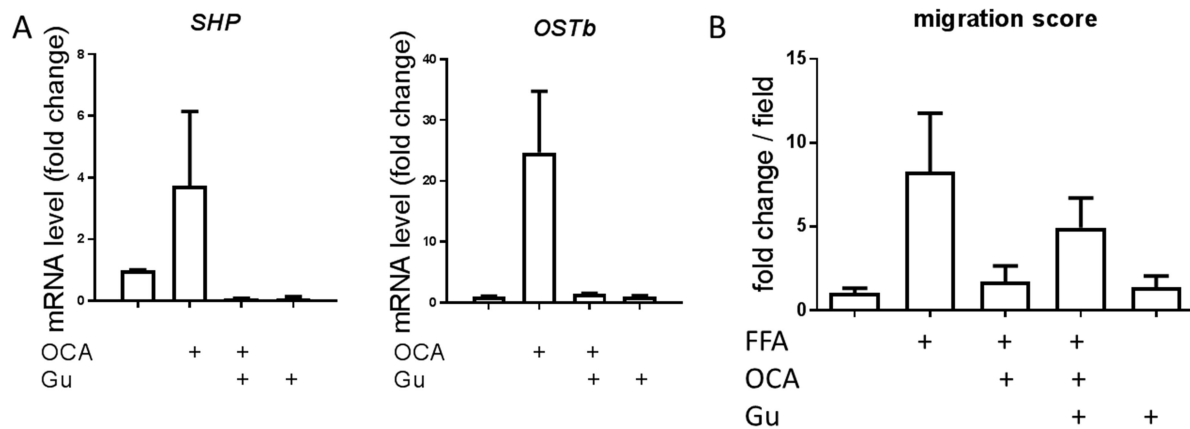

mRNA expression levels of *SHP* and *OSTb* and in Huh7 cells co-exposed for 48h to OCA (2  $\mu$ M) and Gu (25 $\mu$ M) (**A**). Migration score of monocyte-like J773 cells at the indicated conditions.  $n=2$ /group (**B**). Data are expressed as means  $\pm$  SD.

Supplementary Fig. 7. Effect of OCA, Gemfibrozil (GM) or Rifampicin (Rifa) on THP-1 cell migration induced by serum or exogenous LTB<sub>4</sub>.

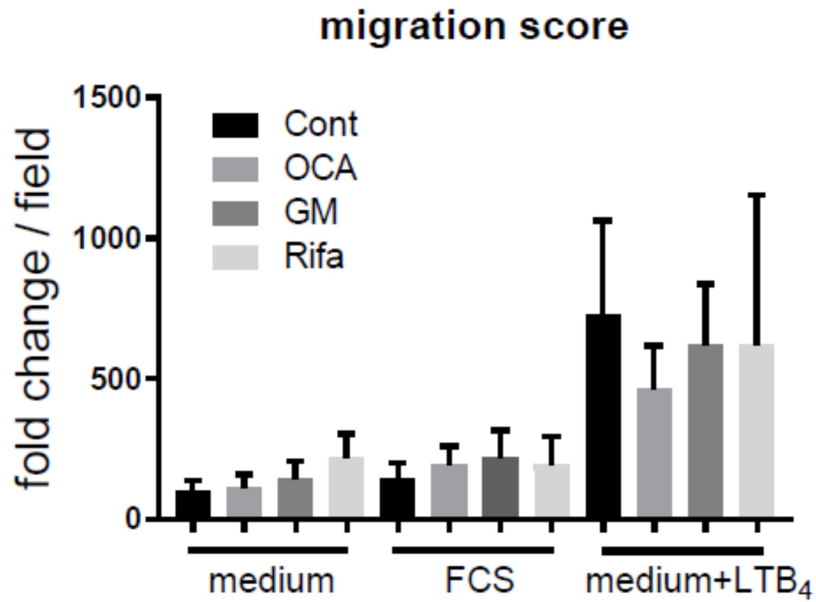

Migration score of THP-1 cells exposed for 48h with the indicated conditions.  $n=3$ /group. Data represents the mean $\pm$ SD from 3 independent experiments.
